# Supplementary material
Source: PubMed Central journal article supplement (PMC10236325)
Supplement: jamaophthalmol-e232062-s002.pdf [file jamaophthalmol-e232062-s002.pdf]

## Data Sharing Statement

Nichols. Bibliometric Analysis of Ophthalmic Journals. *JAMA Ophthalmol.* Published June 01, 2023. doi:10.1001/jamaophthalmol.2023.2062

### Data

**Data available:** Yes

**Data types:** Data (not involving human participants)

**How to access data:** Request data from [n.efron@qut.edu.au](mailto:n.efron@qut.edu.au)

**When available:** With publication

### Supporting Documents

**Document types:** None

### Additional Information

**Who can access the data:** Anyone requesting the data

**Types of analyses:** Bibliometric data

**Mechanisms of data availability:** With investigator support
